# Supplementary material for: A study on the performance of low-cost sensors for source apportionment at an urban background site
Source: Copernicus journal article supplement (doi:10.5194/amt-15-4047-2022), 2022-07-08
Supplement: Supplementary file 1 [file amt-15-4047-2022-supplement.pdf]

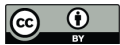

*Supplement of*

## **A study on the performance of low-cost sensors for source apportionment at an urban background site**

**Dimitrios Bousiotis et al.**

*Correspondence to:* Francis Pope (f.pope@bham.ac.uk)

The copyright of individual parts of the supplement might differ from the article licence.

| <b>Monitoring</b>           | <b>Model</b>         | <b>Manufacturer</b> | <b>Grade</b> | <b>Approximate cost (£)</b> |
|-----------------------------|----------------------|---------------------|--------------|-----------------------------|
| OPC                         | OPC-N3               | Alphasense          | LCS          | 250                         |
| NO                          | NO-B43F              | Alphasense          | LCS          | 250                         |
| NO <sub>2</sub>             | NO2-B43F             | Alphasense          | LCS          | 250                         |
| O <sub>x</sub>              | Ox-B43I              | Alphasense          | LCS          | 160                         |
| Black Carbon                | MA200                | Aethlabs            | LCS          | 5,700                       |
| Lung Deposited Surface Area |                      | Naneos              | LCS          | 8,500                       |
| ACSM                        | Quad - ACSM          | Aerodyne            | RG           | 170,000                     |
| PM                          | Fidas 200E           | Palas               | RG           | 25,000                      |
| NO <sub>x</sub>             | T500U                | Teledyne            | RG           | 15,000                      |
| Black Carbon                | AE33<br>Aethalometer | Magee<br>Scientific | RG           | 25,000                      |
| O <sub>3</sub>              | 49i                  | Thermo              | RG           | 3,000                       |

**Table S1: List of LCS and RG instruments used in the present study**

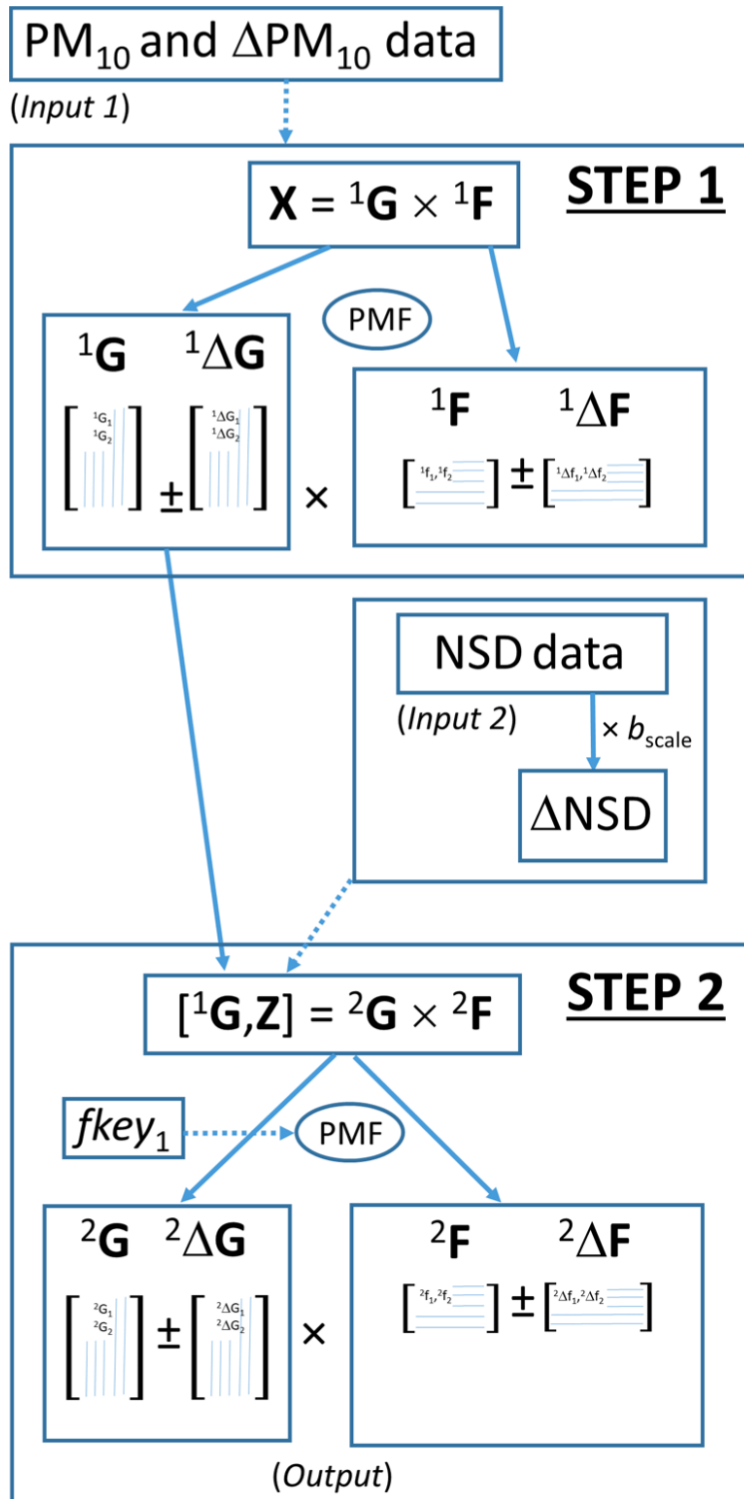

Figure S1: Flow diagram showing the flow of data through the two-step PMF-PMF analysis. The PMF analyses of a single dataset  $\mathbf{X}$  are combined in step 1, and output is indicated by factors and uncertainties  ${}^1\mathbf{G}$ ,  ${}^1\Delta\mathbf{G}$ ,  ${}^1\mathbf{F}$  and  ${}^1\Delta\mathbf{F}$ . The second PMF analysis is carried out on the joint dataset  $[\mathbf{1G}, \mathbf{Z}]$  and yields factors and uncertainties  ${}^2\mathbf{G}$ ,  ${}^2\Delta\mathbf{G}$ ,  ${}^2\mathbf{F}$  and  ${}^2\Delta\mathbf{F}$ . In the Beddows and Harrison, 2019 analysis  $\mathbf{X}$  and  ${}^1\mathbf{G}$  are PM<sub>10</sub> composition data and  $\mathbf{Z}$  is the auxiliary NSD data (opposite to what was used in the present study). Figure and caption are reproduced from Beddows and Harrison, (2019), under the Creative Commons Attribution 4.0 Licence.

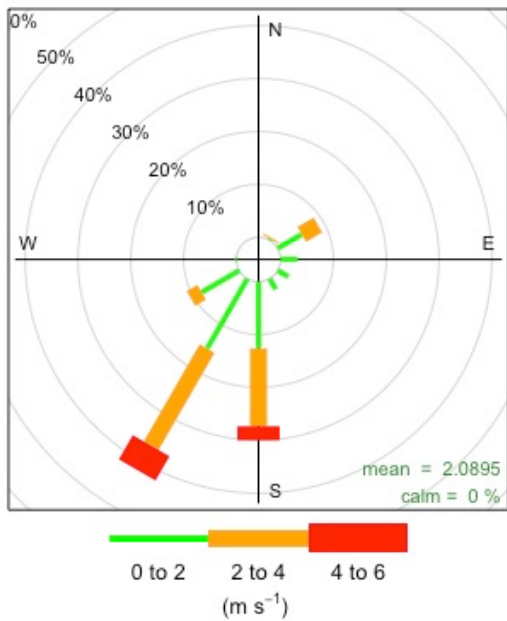

**Frequency of counts by wind direction (%)**

Figure S2: Windrose for BAQS for the measuring period

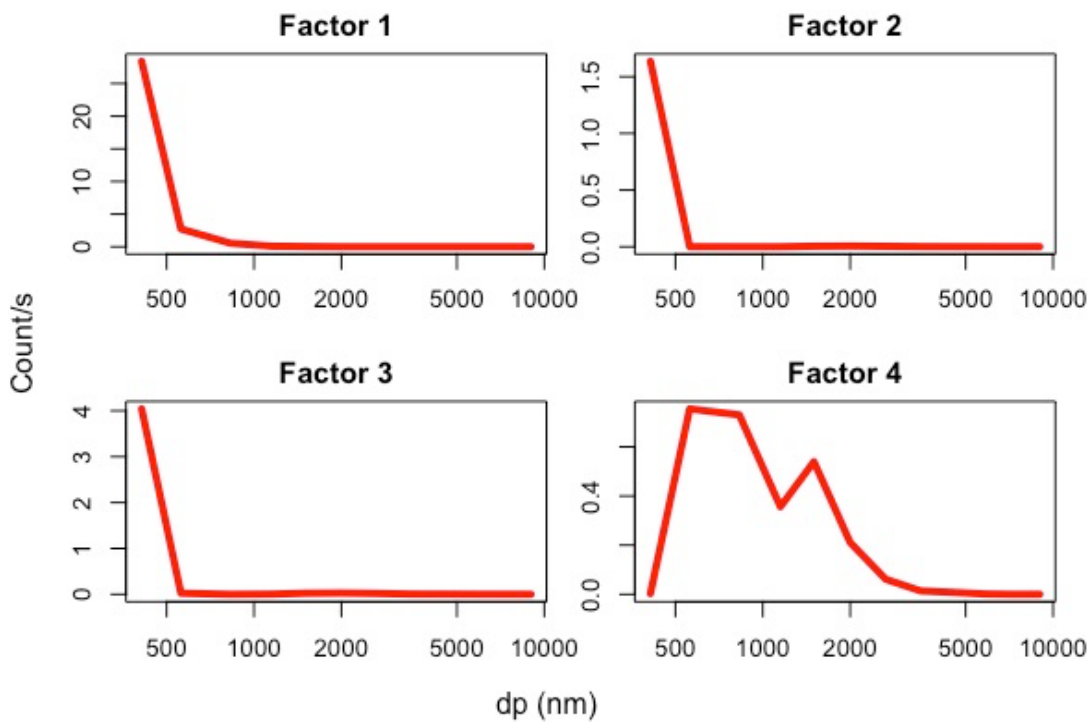

Figure S3: Particle profiles of the factors from the PMF analysis (including the smallest particle size bin available). The lines indicate the average particle count per second for each particle size bin.

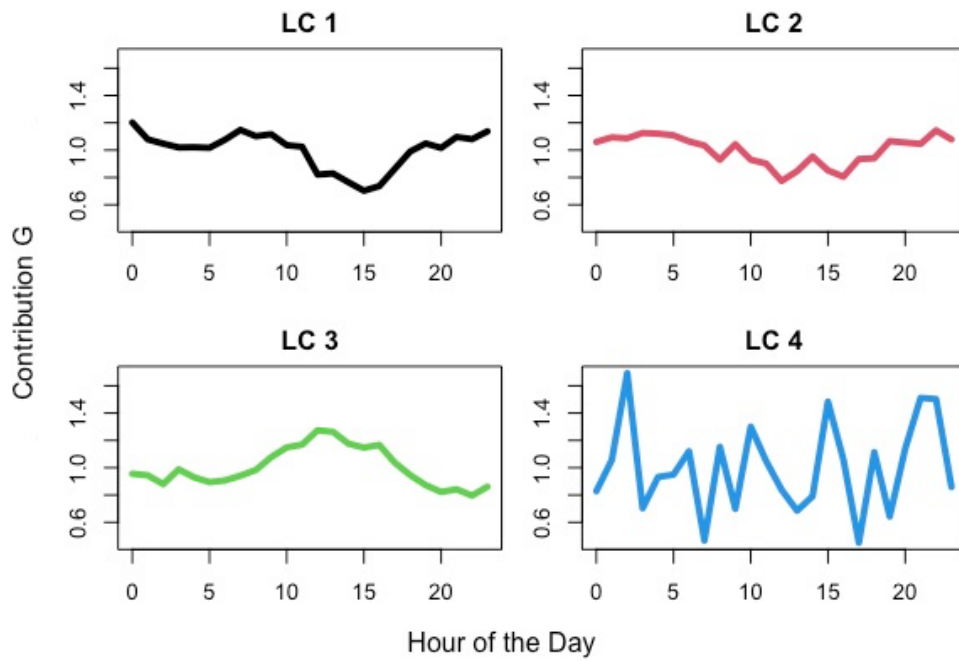

Figure S4: Diurnal variation of the contribution G of the factors from the LC analysis. Higher contributions indicate greater effect of the factor at the given time of the day.

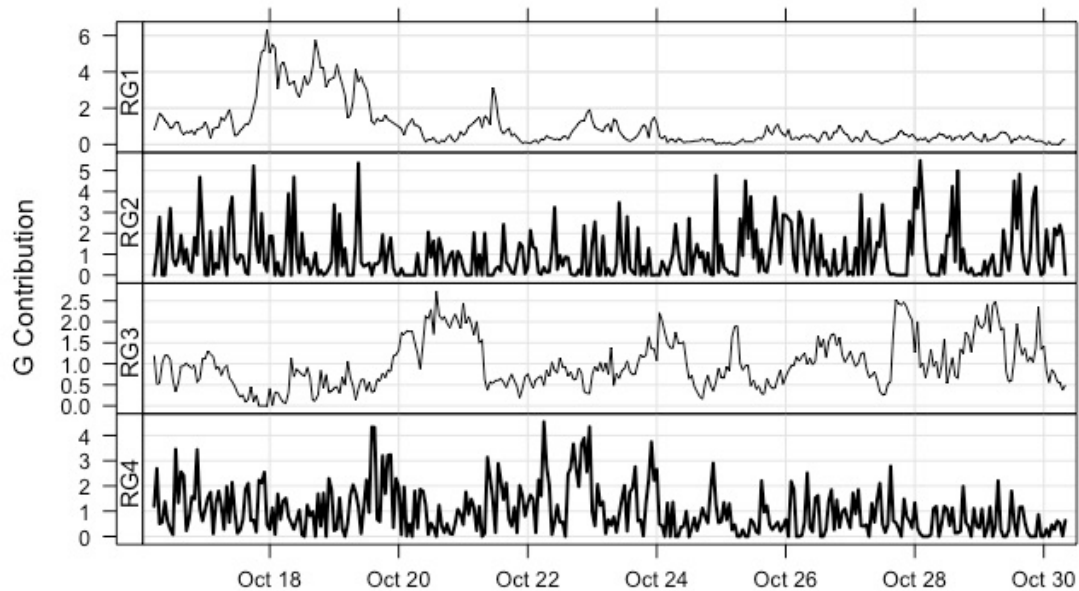

Figure S5: Temporal variation for RG

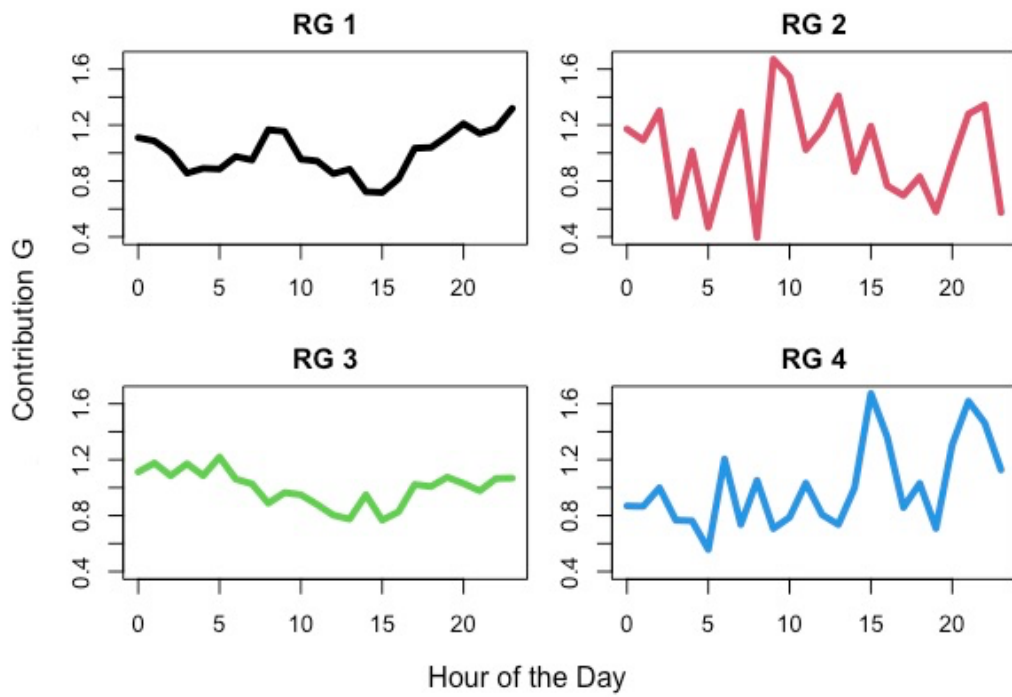

Figure S6: Diurnal variation of the contribution G of the factors from the RG analysis. Higher contributions indicate greater effect of the factor at the given time of the day.
